# Supplementary material for: Association of Early Treatment With Chronicity and Hazard of Hospitalization After New Adjustment Disorder
Source: Atypon-hosted journal article supplement (doi:10.1176/appi.psychotherapy.20190019), 2020-01-29
Supplement: appi.psychotherapy.20190019.ds001.pdf [file appi.psychotherapy.20190019.ds001.pdf]

**Online Appendix.** Supplementary tables and figures pertaining to discussion of benzodiazepines.

Table A1. Covariate Balance Testing for Unweighted and Benzodiazepine Treated Weighted Samples.

|                                             | Unweighted |         |        | Weighted |         |        |
|---------------------------------------------|------------|---------|--------|----------|---------|--------|
|                                             | Treated    | Control | T-stat | Treated  | Control | T-stat |
| Female                                      | 0.74       | 0.62    | 20.77  | 0.74     | 0.78    | -2.75  |
| Birth year 1980-1999                        | 0.12       | 0.29    | -32.51 | 0.12     | 0.07    | 4.27   |
| Birth year 1960-1979                        | 0.44       | 0.41    | 4.74   | 0.44     | 0.39    | 2.88   |
| Birth year 1940-1959                        | 0.37       | 0.24    | 26.29  | 0.37     | 0.44    | -3.96  |
| Birth year before 1939                      | 0.07       | 0.04    | 13.44  | 0.07     | 0.10    | -3.49  |
| Age                                         | 44.96      | 36.91   | 41.65  | 44.96    | 48.77   | -7.18  |
| Employment Status= Retired                  | 0.08       | 0.03    | 20.55  | 0.08     | 0.13    | -4.94  |
| Employment Status= COBRA/Disability         | 0.01       | 0.01    | 8.00   | 0.01     | 0.01    | -0.10  |
| Employment Status= Deceased Spouse          | 0.03       | 0.01    | 18.83  | 0.03     | 0.06    | -5.35  |
| Employment Status= Other                    | 0.44       | 0.58    | -25.34 | 0.44     | 0.36    | 4.52   |
| Employee Relation= Spouse                   | 0.27       | 0.21    | 13.88  | 0.27     | 0.28    | -0.51  |
| Employee Relation= Child or Other Dependent | 0.07       | 0.24    | -35.32 | 0.07     | 0.04    | 3.49   |
| Census Region 1                             | 0.16       | 0.16    | -1.41  | 0.16     | 0.13    | 2.04   |
| Census Region 2                             | 0.25       | 0.28    | -5.34  | 0.25     | 0.24    | 0.59   |
| Census Region 3                             | 0.37       | 0.36    | 2.11   | 0.37     | 0.38    | -0.81  |
| Census Region 4                             | 0.22       | 0.19    | 4.92   | 0.22     | 0.24    | -1.46  |
| MHSA Coverage                               | 0.73       | 0.62    | 20.62  | 0.73     | 0.77    | -2.79  |
| ICD Infectious Disease                      | 0.01       | 0.01    | -0.64  | 0.01     | 0.02    | -1.18  |
| ICD Neoplasm                                | 0.03       | 0.02    | 8.12   | 0.03     | 0.03    | -1.68  |
| ICD Endocrine/Immune                        | 0.07       | 0.05    | 7.05   | 0.07     | 0.08    | -1.53  |
| ICD Blood                                   | 0.01       | 0.01    | 2.59   | 0.01     | 0.01    | 0.37   |
| ICD Mental Illness                          | 0.56       | 0.63    | -14.59 | 0.56     | 0.49    | 4.87   |
| ICD Nervous System                          | 0.04       | 0.03    | 4.17   | 0.04     | 0.05    | -1.42  |
| ICD Circulatory                             | 0.06       | 0.04    | 10.51  | 0.06     | 0.08    | -3.07  |
| ICD Respiratory                             | 0.06       | 0.06    | 1.09   | 0.06     | 0.05    | 1.11   |
| ICD Digestive                               | 0.02       | 0.02    | 6.88   | 0.02     | 0.03    | -1.72  |
| ICD Genitourinary                           | 0.04       | 0.03    | 6.63   | 0.04     | 0.05    | -0.11  |
| ICD Pregnancy                               | 0.00       | 0.01    | -1.81  | 0.00     | 0.00    | 0.72   |
| ICD Skin                                    | 0.02       | 0.02    | -1.19  | 0.02     | 0.02    | -0.86  |
| ICD Musculoskeletal                         | 0.12       | 0.10    | 6.36   | 0.12     | 0.16    | -3.10  |
| ICD Congenital                              | 0.00       | 0.00    | -0.06  | 0.00     | 0.00    | -0.91  |
| ICD Perinatal                               | 0.00       | 0.00    | -0.43  | 0.00     | 0.00    | 0.59   |
| ICD Ill-defined                             | 0.13       | 0.08    | 18.33  | 0.13     | 0.17    | -4.32  |
| ICD Injury/Poison                           | 0.03       | 0.03    | -0.38  | 0.03     | 0.03    | 1.08   |
| ICD Other                                   | 0.11       | 0.11    | 2.94   | 0.11     | 0.12    | -0.86  |
| Number of Chronic Conditions                | 5.26       | 4.25    | 8.53   | 5.26     | 7.24    | -3.71  |
| Diagnosed By Psych                          | 0.21       | 0.38    | -31.96 | 0.21     | 0.17    | 2.72   |
| Diagnosed Inpatient                         | 0.01       | 0.01    | 5.19   | 0.01     | 0.01    | -1.03  |
| Received Psychotherapy After Diagnosis      | 0.71       | 0.83    | -28.16 | 0.71     | 0.59    | 7.45   |
| County Percent Urban                        | 0.83       | 0.85    | -9.00  | 0.83     | 0.82    | 1.42   |
| County Census Population                    | 770 000    | 870 000 | -5.26  | 770 000  | 740 000 | 0.69   |
| County Psychiatrists per 100 000            | 11.83      | 12.53   | -4.17  | 11.83    | 10.92   | 1.82   |
| County Percent Hispanic                     | 0.13       | 0.13    | -3.74  | 0.13     | 0.12    | 0.98   |
| County Median Income                        | 52321      | 53671   | -9.07  | 52321    | 51301   | 2.31   |
| County Percent Poverty                      | 0.13       | 0.13    | 6.88   | 0.13     | 0.13    | -2.11  |

MHSA is an indicator for mental health or substance use insurance coverage. Omitted category for birth cohort is born after 2000. Omitted category for employment status is full and part time employees. Omitted category for employee relation is plan holder. Omitted category for census region is 5.

Table A2. Hazard Ratio of Hospitalization Associated with Benzodiazepines.

| <b>Psychiatric Hospitalization</b> | <b>Propensity Score (IPTW)</b> |           |        | <b>Full Sample (Unweighted)</b> |           |         |
|------------------------------------|--------------------------------|-----------|--------|---------------------------------|-----------|---------|
|                                    | HR                             | 95%CI     | N      | HR                              | 95%CI     | N       |
| Received Benzodiazepines           | 1.59                           | 1.02-2.51 | 295957 | 1.67                            | 1.51-1.85 | 5936551 |

  

| <b>All Hospitalization</b> | <b>Propensity Score</b> |          |        | <b>Full Sample (Unweighted)</b> |          |         |
|----------------------------|-------------------------|----------|--------|---------------------------------|----------|---------|
|                            | HR                      | 95%CI    | N      | HR                              | 95%CI    | N       |
| Received Benzodiazepines   | 1.01                    | .85-1.20 | 248395 | 1.53                            | 1.46-1.6 | 5266131 |

Cox proportional hazard model of psychiatric hospitalization for receipt of psychotherapy versus not or psychoactive prescription versus not after new diagnosis of adjustment disorder. Mean hazard ratio and 95% confidence interval (brackets) shown for unweighted full sample, and inverse probability of treatment weighted (IPTW) subsample of patients with non-missing data. N represents the number of observations.
